# Supplementary material for: Luminescence properties and energy transfer of K3LuF6:Tb3+,Eu3+ multicolor phosphors with a cryolite structure
Source: Royal Society of Chemistry journal article supplement (doi:10.1039/c8ra10059d), 2019-01-01
Supplement: c8ra10059d1.pdf [file c8ra10059d1.pdf]

**Supporting Information for:**

**Luminescence properties and energy transfer of  $\text{K}_3\text{LuF}_6$ :  $\text{Tb}^{3+}$ ,  $\text{Eu}^{3+}$   
multicolor phosphors with cryolite structure**

Dan Yang,<sup>a</sup> Libing Liao,<sup>\*a</sup> Qingfeng Guo,<sup>\*b, c</sup> Lefu Mei,<sup>\*a</sup> Haikun Liu,<sup>a</sup> Tianshuai Zhou,<sup>a</sup> Huan

Ye,<sup>b, c</sup>

<sup>a</sup> *Beijing Key Laboratory of Materials Utilization of Nonmetallic Minerals and Solid Wastes,  
National Laboratory of Mineral Materials. School of Materials Sciences and Technology, China  
University of Geosciences, Beijing 100083, China*

<sup>b</sup> *School of Gemology, China University of Geosciences, Beijing 100083, China.*

<sup>c</sup> *Jewelry and mineral materials Laboratory of experimental teaching demonstration center,  
Beijing, China*

---

<sup>\*\*</sup> Corresponding Authors

**Libing Liao**, E-mail: [clayl@cugb.edu.cn](mailto:clayl@cugb.edu.cn);

**Qingfeng Guo**, E-mail: [qfguo@cugb.edu.cn](mailto:qfguo@cugb.edu.cn);

**Lefu Mei**, E-mail: [mlf@cugb.edu.cn](mailto:mlf@cugb.edu.cn)

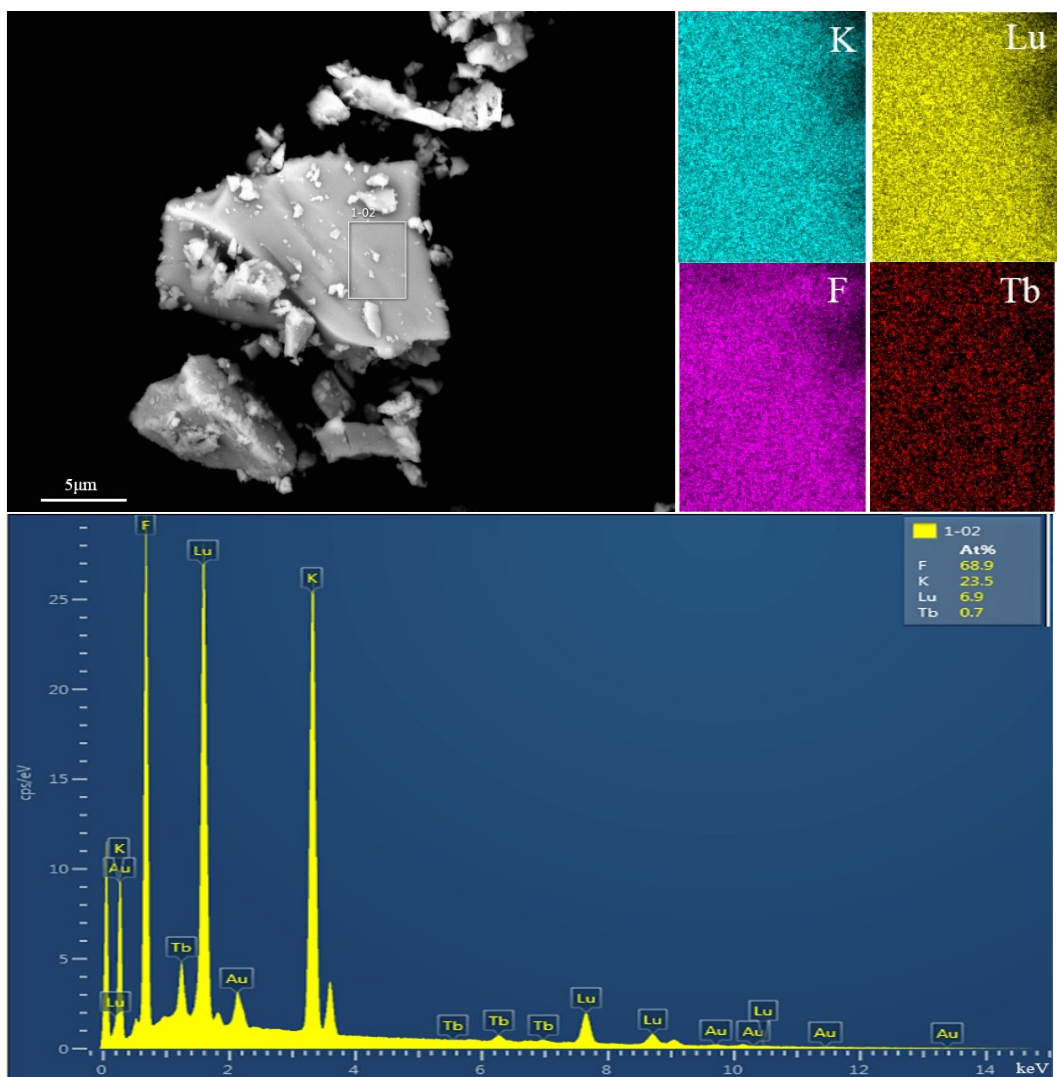

**Fig. S1** SEM image, elemental mapping and EDX spectrum of  $K_3LuF_6:0.12Tb^{3+}$  phosphor.

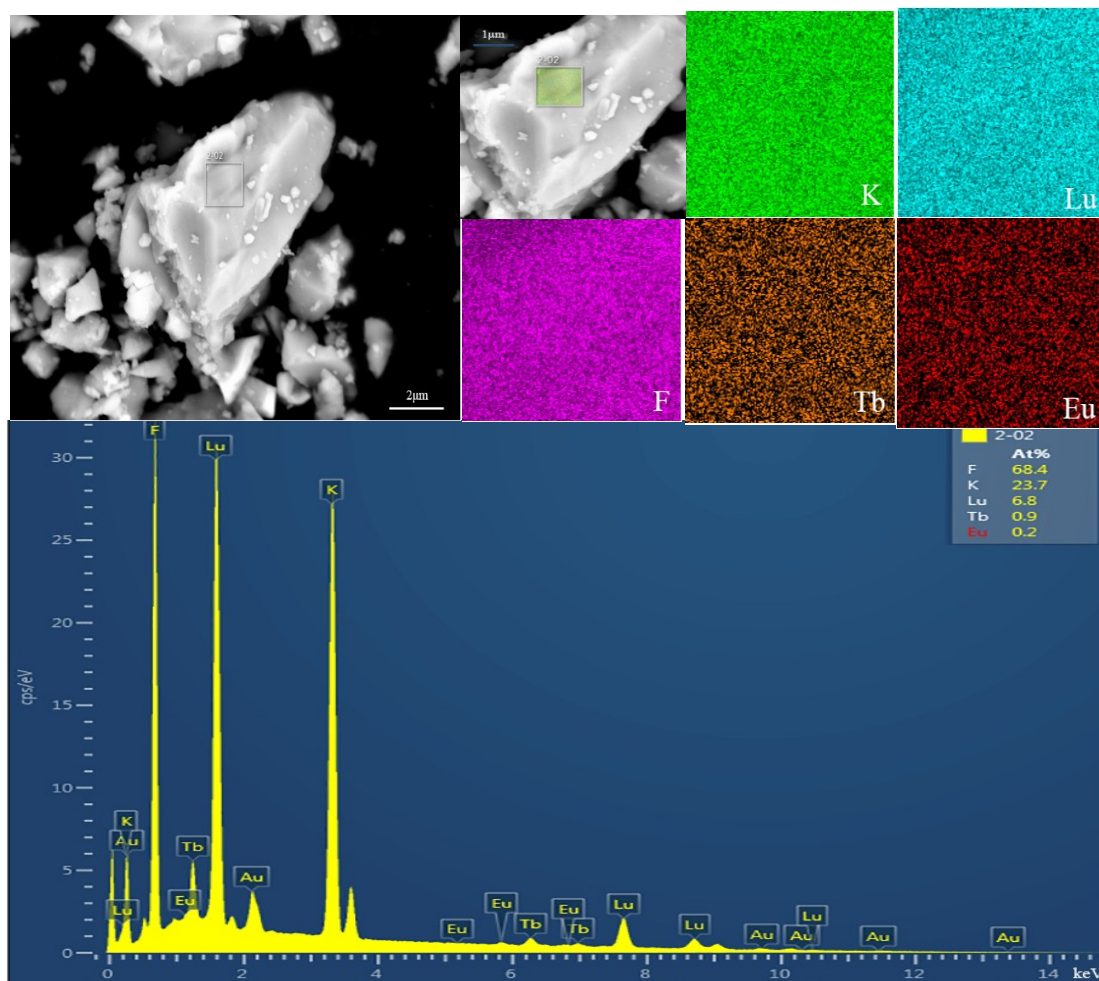

**Fig. S2** SEM image, elemental mapping and EDX spectrum of  $\text{K}_3\text{LuF}_6:0.12\text{Tb}^{3+}$ ,  $0.03\text{Eu}^{3+}$  phosphor.

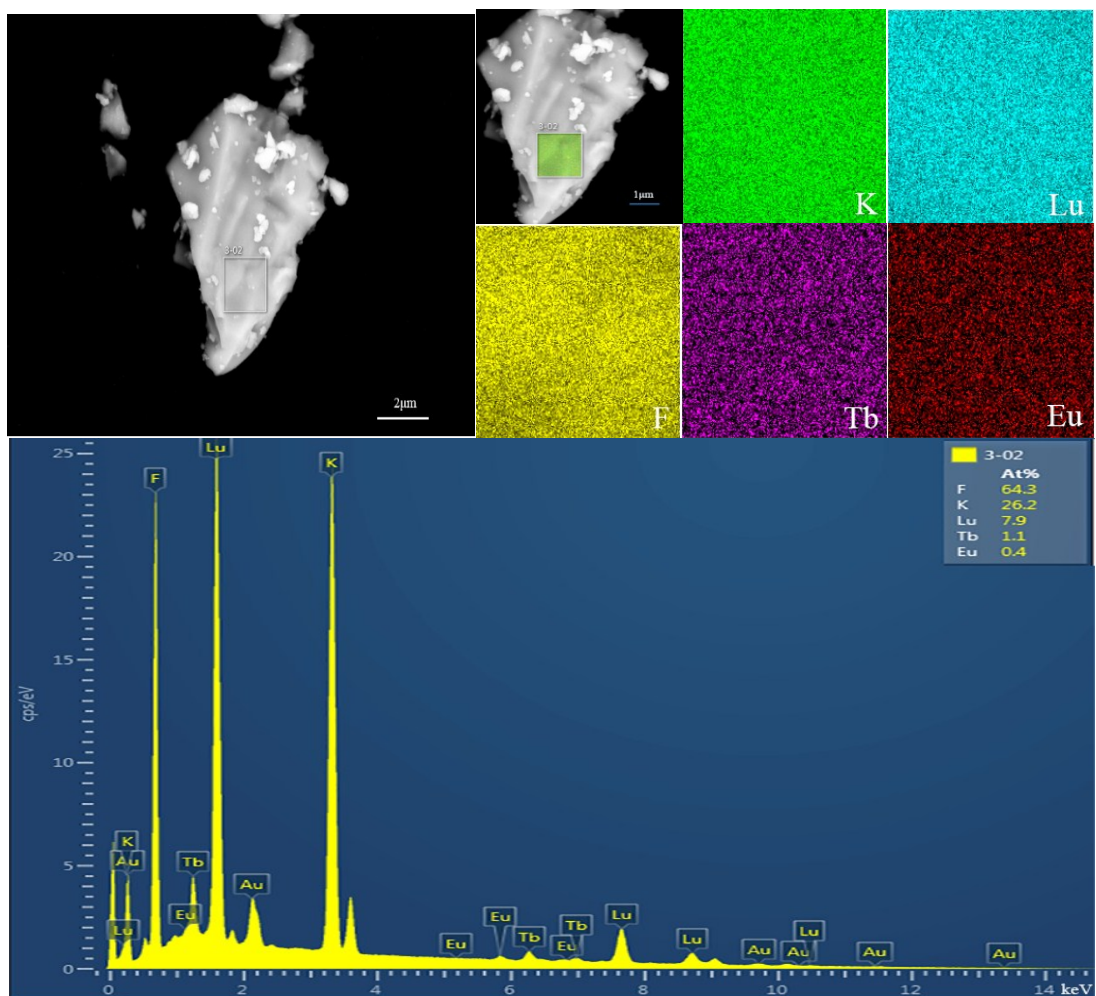

**Fig. S3** SEM image, elemental mapping and EDX spectrum of  $\text{K}_3\text{LuF}_6:0.12\text{Tb}^{3+}, 0.05\text{Eu}^{3+}$  phosphor.

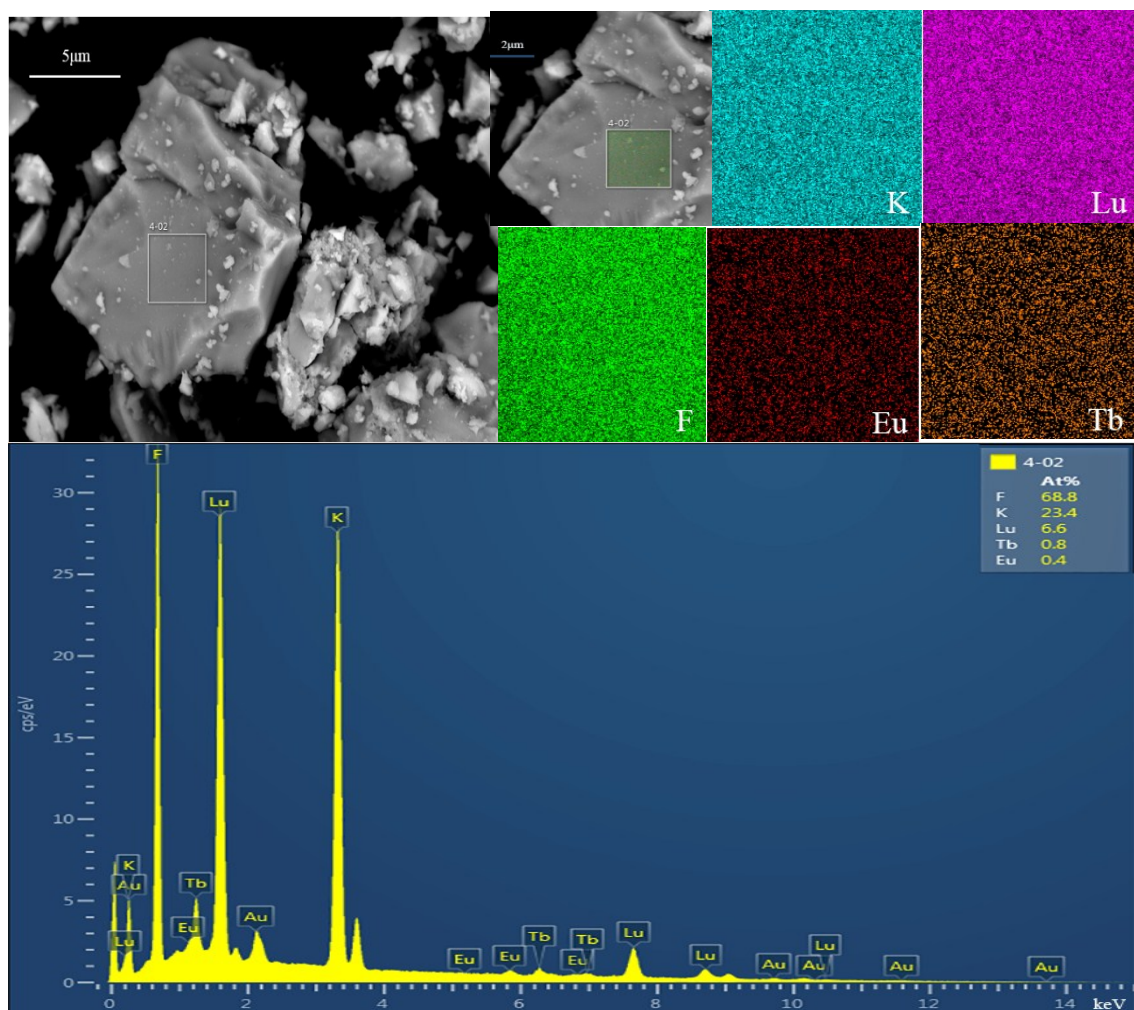

**Fig. S4** SEM image, elemental mapping and EDX spectrum of  $\text{K}_3\text{LuF}_6:0.12\text{Tb}^{3+}$ ,  $0.07\text{Eu}^{3+}$  phosphor.

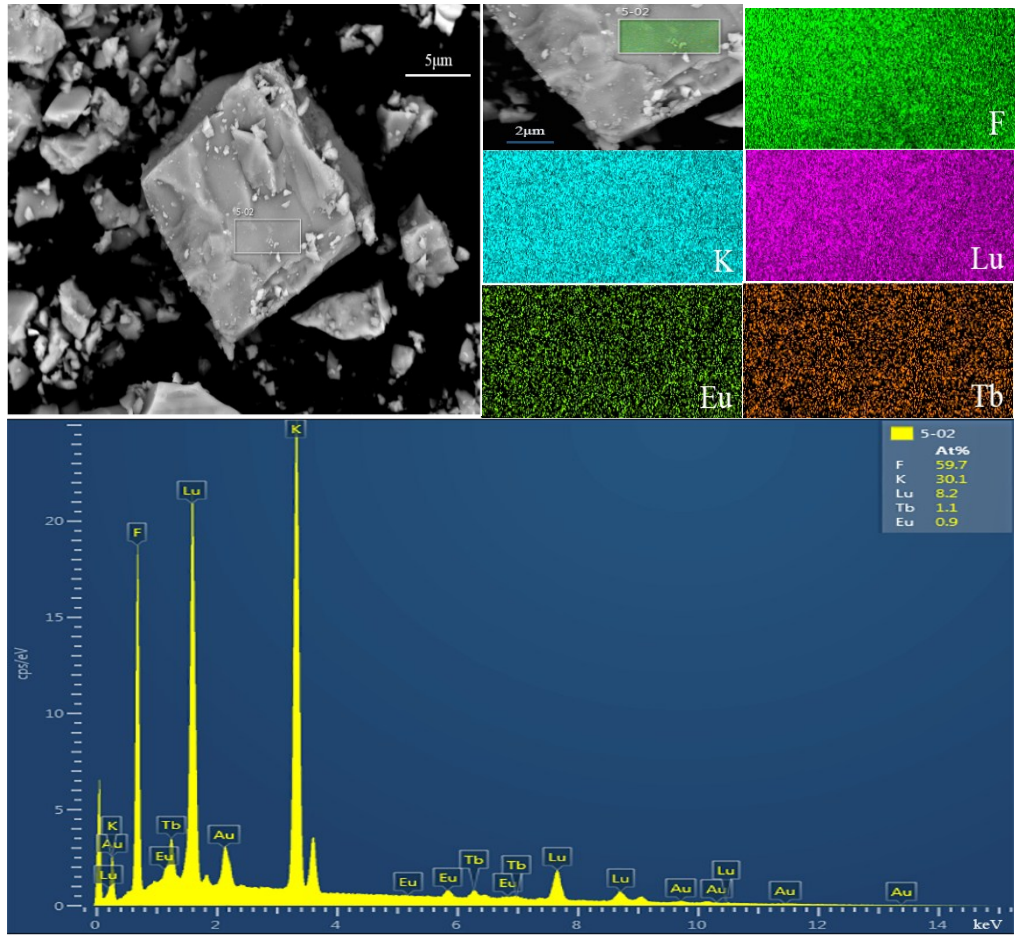

**Fig. S5** SEM image, elemental mapping and EDX spectrum of  $\text{K}_3\text{LuF}_6:0.12\text{Tb}^{3+}, 0.10\text{Eu}^{3+}$  phosphor.

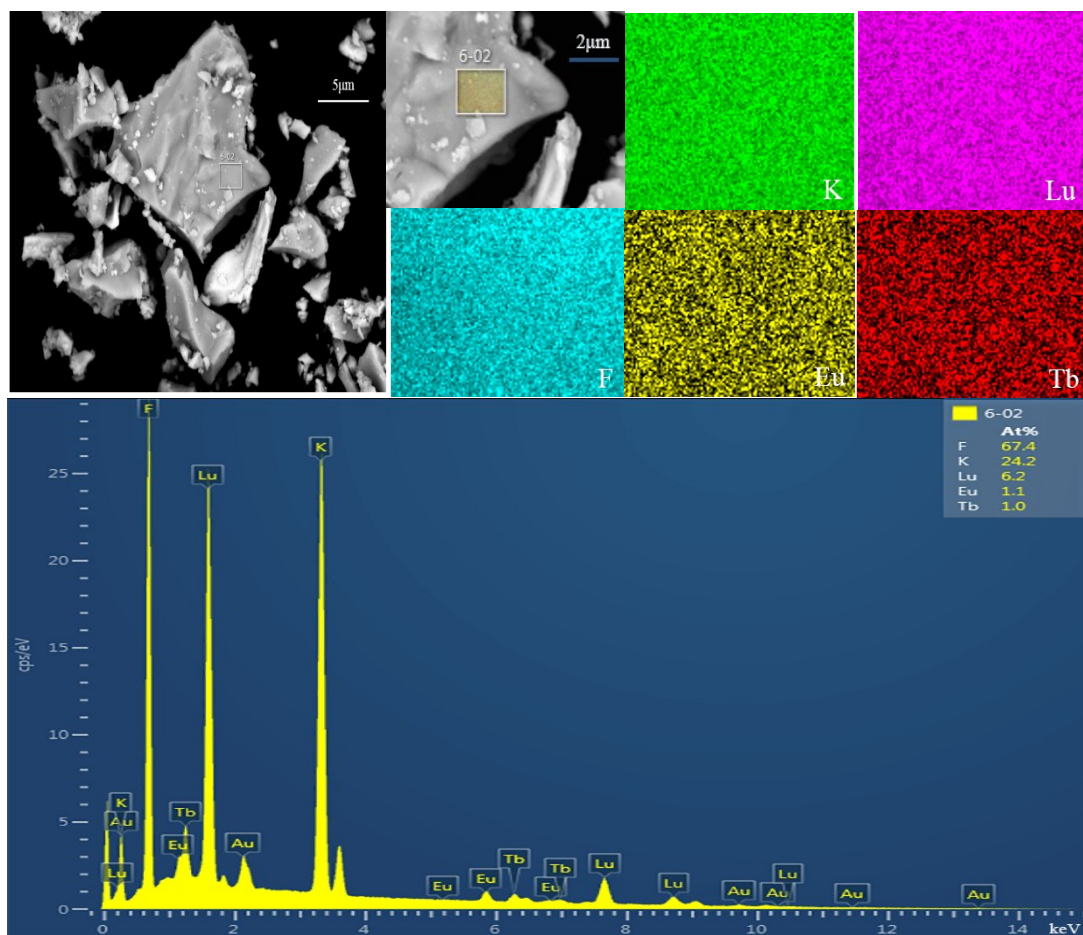

**Fig. S6** SEM image, elemental mapping and EDX spectrum of  $\text{K}_3\text{LuF}_6:0.12\text{Tb}^{3+}, 0.13\text{Eu}^{3+}$  phosphor.
